# Supplementary material
Source: publisher site journal article supplement (https://www.dovepress.com/article/235981)
Supplement: Supplementary file 1 [file get_supplementary_file.php]

Supplementary Material

Additional tables – The frequency distribution and association (chi-square) between General obesity (BMI) versus overall central obesity (WC, WHtR, WHR), Pre-HTN, HTN, Pre-DM, DM), n = 381, Ethiopia.

Contents

|                                                                                                                                                                                                                                 |   |
|---------------------------------------------------------------------------------------------------------------------------------------------------------------------------------------------------------------------------------|---|
| <b>Table 01</b> Frequency distribution of central obesity defined by either WC, WHtR, WHR of the study population stratified by BMI category, North West Ethiopia (n = 381). .....                                              | 2 |
| <b>Table 02</b> Frequency distribution of pre-hypertension based on measured systolic and/or diastolic blood pressure of the study population stratified by BMI category, North West Ethiopia (n = 381). .....                  | 2 |
| <b>Table 03</b> Frequency distribution of hypertension based on self-reported and/or measured systolic and/or diastolic blood pressure of the study population stratified by BMI category, North West Ethiopia (n = 381). ..... | 3 |
| <b>Table 04</b> Frequency distribution of impaired fasting glucose based on measured fasting glucose of the study population stratified by BMI category, North West Ethiopia (n = 381). .....                                   | 3 |
| <b>Table 05</b> Frequency distribution of diabetes mellitus based on self-reported and/or measured fasting glucose of the study population stratified by BMI category, North West Ethiopia (n = 381). .....                     | 4 |

|  |
|--|
|  |
|--|





**Table 05 Frequency distribution of diabetes mellitus based on self-reported and/or measured fasting glucose of the study population stratified by BMI category, North West Ethiopia (n = 381).**

| Self-reported/fasting blood glucose based Diabetes mellitus versus BMI category |     |                               |              |            |             |             |
|---------------------------------------------------------------------------------|-----|-------------------------------|--------------|------------|-------------|-------------|
|                                                                                 |     |                               | BMI category |            |             | Total       |
|                                                                                 |     |                               | Normal       | Pre-obese  | Obese       |             |
| Diabetes mellitus                                                               | No  | Count (% within BMI category) | 262 (95.3%)  | 88 (97.8%) | 14 (87.5%)  | 364 (95.5%) |
|                                                                                 | Yes | Count (% within BMI category) | 13 (4.7%)    | 2 (2.2%)   | 2 (12.5%)   | 17 (4.5%)   |
| Total                                                                           |     | Count (% within BMI category) | 275 (100%)   | 90 (100%)  | 16 (100.0%) | 381 (100%)  |

| Chi-Square Tests                                                                       |                    |    |                       |
|----------------------------------------------------------------------------------------|--------------------|----|-----------------------|
|                                                                                        | Value              | df | Asymp. Sig. (2-sided) |
| Pearson Chi-Square                                                                     | 3.530 <sup>a</sup> | 2  | .171                  |
| Likelihood Ratio                                                                       | 2.994              | 2  | .224                  |
| Linear-by-Linear Association                                                           | .063               | 1  | .802                  |
| N of Valid Cases                                                                       | 381                |    |                       |
| a. 2 cells (33.3%) have expected count less than 5. The minimum expected count is .71. |                    |    |                       |
